# Supplementary material for: A Comprehensive Strategy for Stepwise Design of a Lab PROTOTYPE for the Removal of Emerging Contaminants in Water Using Cyclodextrin Polymers as Adsorbent Material
Source: MDPI journal article supplement (doi:10.3390/ijms25052829), 2024-02-29
Supplement: s1 [file s1]

**Supplementary Material for “A comprehensive strategy for stepwise design of a lab prototype for the removal of emerging contaminants in water using cyclodextrin polymers as adsorbent material”**

Antonio Tomás Hernández Cegarra <sup>1</sup>; Teresa Gómez-Morte <sup>1</sup>; José Antonio Pellicer <sup>1</sup>; Nuria Vela <sup>2</sup>; María Isabel Rodríguez-López <sup>1</sup>, Estrella Núñez-Delicado <sup>1</sup>, and José Antonio Gabaldón

<sup>1\*</sup>

Affiliations:

<sup>1</sup> Molecular Recognition and Encapsulation Research Group (REM), Health Sciences Department, Universidad Católica de Murcia (UCAM), Campus de los Jerónimos 135, E-30107, Guadalupe, Spain

<sup>2</sup> Applied Technology Group to Environmental Health, Universidad Católica de Murcia (UCAM), Campus de los Jerónimos 135, E-30107, Guadalupe, Spain.

\*Corresponding author: José Antonio Gabaldón ([jagabaldon@ucam.edu](mailto:jagabaldon@ucam.edu))

## Supplemental figures

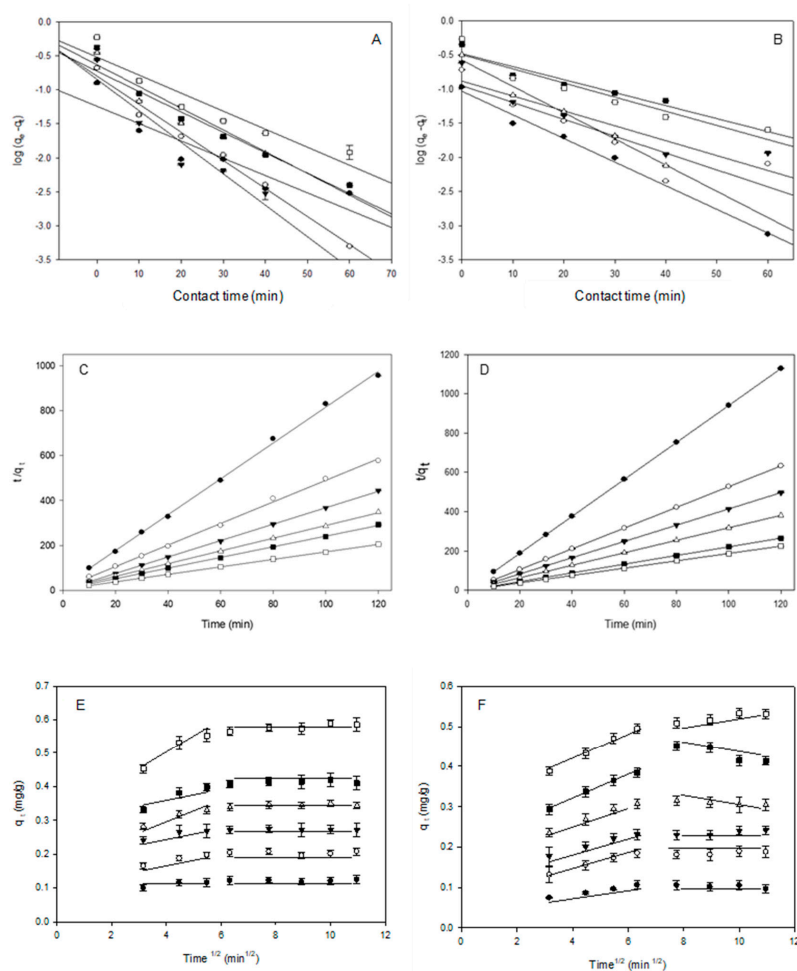

**Fig. S1.** Kinetic analysis at different concentrations: 5.0 mg/L (●), 7.5 mg/L (○), 10 mg/L (▼), 12.5 mg/L (△), 15 mg/L (■), 20 mg/L (□) of pharmaceuticals. Furosemide (A) Pseudo 1<sup>st</sup> model, (C) Pseudo 2<sup>nd</sup> model, (E) Intraparticle diffusion mode; Hydrochlorothiazide (B) Pseudo 1<sup>st</sup> model, (D) Pseudo 2<sup>nd</sup> model, (F) Intraparticle diffusion mode; N=3.

Commented [g1]: Symbol has been changed properly

## Supplemental figures

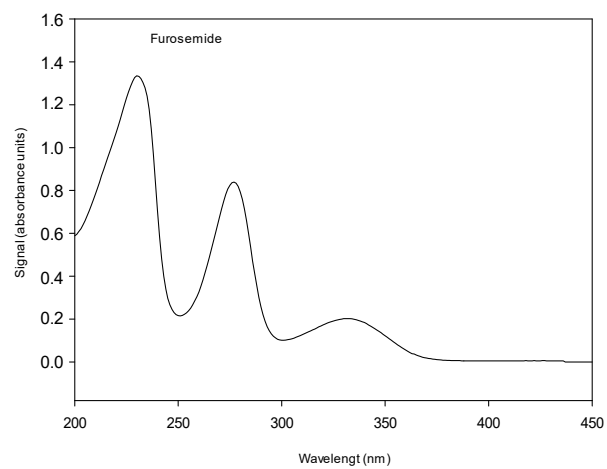

**Fig. S2.** Absorption spectra of furosemide

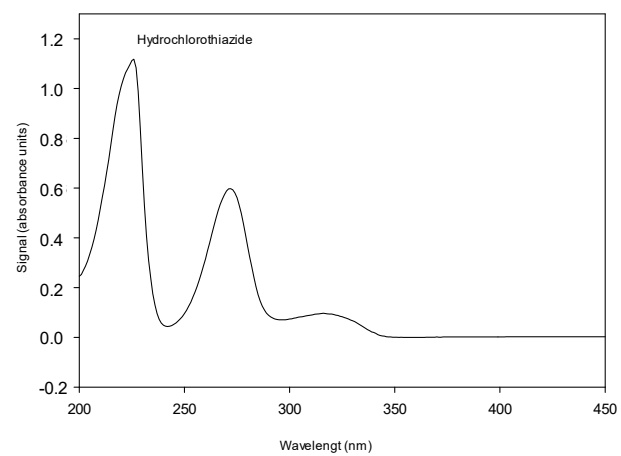

**Fig. S3.** Absorption spectra of hydrochlorothiazide

## Supplemental tables

**Table S1.**  $\beta$ -CD-EPI polymer kinetic parameters (pseudo 1<sup>st</sup>, pseudo 2<sup>nd</sup> and intraparticle diffusion models).

| PFOM      |               | $\beta$ -CDs-EPI polymer and Furosemide          |                                  |                |
|-----------|---------------|--------------------------------------------------|----------------------------------|----------------|
| Co (mg/L) | $q\ell_{exp}$ | $q\ell_{cal}$                                    | $K_1$ (min <sup>-1</sup> )       | R <sup>2</sup> |
| 5         | 0.126         | 0.057                                            | 0.059                            | 0.834          |
| 7.5       | 0.208         | 0.158                                            | 0.095                            | 0.987          |
| 10        | 0.275         | 0.142                                            | 0.106                            | 0.895          |
| 12.5      | 0.350         | 0.187                                            | 0.069                            | 0.936          |
| 15        | 0.419         | 0.232                                            | 0.073                            | 0.946          |
| 20        | 0.588         | 0.301                                            | 0.061                            | 0.896          |
| PSOM      |               | $\beta$ -CDs-EPI polymer and Furosemide          |                                  |                |
| Co (mg/L) | $q\ell_{exp}$ | $q\ell_{cal}$                                    | $K_2$ (g/mg min)                 | R <sup>2</sup> |
| 5         | 0.126         | 0.126                                            | 3.691                            | 0.998          |
| 7.5       | 0.208         | 0.208                                            | 2.380                            | 0.998          |
| 10        | 0.275         | 0.273                                            | 6.500                            | 0.999          |
| 12.5      | 0.350         | 0.353                                            | 1.432                            | 0.999          |
| 15        | 0.419         | 0.422                                            | 1.300                            | 0.999          |
| 20        | 0.588         | 0.601                                            | 0.622                            | 0.999          |
| IDM       |               | $\beta$ -CDs-EPI polymer and Furosemide          |                                  |                |
| Co (mg/L) | $q\ell_{exp}$ | $q\ell_{cal}$                                    | $K_i$ (mg/g min <sup>1/2</sup> ) | R <sup>2</sup> |
| 5         | 0.126         | 0.102                                            | 0.002                            | 0.602          |
| 7.5       | 0.208         | 0.168                                            | 0.004                            | 0.576          |
| 10        | 0.275         | 0.249                                            | 0.003                            | 0.470          |
| 12.5      | 0.350         | 0.283                                            | 0.007                            | 0.701          |
| 15        | 0.419         | 0.336                                            | 0.009                            | 0.639          |
| 20        | 0.588         | 0.455                                            | 0.014                            | 0.715          |
| PFOM      |               | $\beta$ -CDs-EPI polymer and Hydrochlorothiazide |                                  |                |
| Co (mg/L) | $q\ell_{exp}$ | $q\ell_{cal}$                                    | $K_1$ (min <sup>-1</sup> )       | R <sup>2</sup> |
| 5         | 0.106         | 0.093                                            | 0.080                            | 0.991          |
| 7.5       | 0.190         | 0.803                                            | 0.057                            | 0.805          |
| 10        | 0.242         | 0.131                                            | 0.050                            | 0.834          |
| 12.5      | 0.315         | 0.264                                            | 0.088                            | 0.984          |
| 15        | 0.452         | 0.328                                            | 0.044                            | 0.889          |
| 20        | 0.534         | 0.318                                            | 0.048                            | 0.903          |
| PSOM      |               | $\beta$ -CDs-EPI polymer and Hydrochlorothiazide |                                  |                |

| <i>C<sub>0</sub></i> (mg/L)                      | <i>q<sub>e</sub><sub>exp</sub></i> | <i>q<sub>e</sub><sub>cal</sub></i> | <i>K<sub>2</sub></i> (g/mg min)     | R <sup>2</sup> |
|--------------------------------------------------|------------------------------------|------------------------------------|-------------------------------------|----------------|
| 5                                                | 0.106                              | 0.106                              | 7.322                               | 0.992          |
| 7.5                                              | 0.190                              | 0.190                              | 1.187                               | 0.999          |
| 10                                               | 0.242                              | 0.242                              | 0.950                               | 0.999          |
| 12.5                                             | 0.315                              | 0.315                              | 1.593                               | 0.999          |
| 15                                               | 0.452                              | 0.452                              | 0.513                               | 0.992          |
| 20                                               | 0.534                              | 0.534                              | 0.350                               | 0.999          |
| <b>IDM</b>                                       |                                    |                                    |                                     |                |
| <b>β-CDs-EPI polymer and Hydrochlorothiazide</b> |                                    |                                    |                                     |                |
| <i>C<sub>0</sub></i> (mg/L)                      | <i>q<sub>e</sub><sub>exp</sub></i> | <i>q<sub>e</sub><sub>cal</sub></i> | <i>K<sub>i</sub></i> (mg/g min 1/2) | R <sup>2</sup> |
| 5                                                | 0.106                              | 0.077                              | 0.003                               | 0.471          |
| 7.5                                              | 0.190                              | 0.129                              | 0.006                               | 0.716          |
| 10                                               | 0.242                              | 0.171                              | 0.007                               | 0.792          |
| 12.5                                             | 0.315                              | 0.237                              | 0.008                               | 0.595          |
| 15                                               | 0.452                              | 0.270                              | 0.017                               | 0.685          |
| 20                                               | 0.534                              | 0.359                              | 0.018                               | 0.885          |

**Table S2.** On/off positions of the valves when working co-current flow.

| Up-Down Flow |       |     |
|--------------|-------|-----|
|              | Drive |     |
| TAG          | On    | Off |
| HV01         | X     |     |
| HV02         |       | X   |
| HV03         | X     |     |
| DV01         |       | X   |
| DV02         |       | X   |
| DV03         |       | X   |
| SV01         |       | X   |
| SV02         |       | X   |
| SV03         |       | X   |
| P01          | X     |     |
| RG-01        | X     |     |

**Table S3.** On/off positions of the valves when working counter-current flow.

| Down-Up Flow |       |     |
|--------------|-------|-----|
|              | Drive |     |
| TAG          | On    | Off |
| HV01         | X     |     |
| HV02         | X     |     |
| HV03         |       | X   |
| DV01         |       | X   |
| DV02         |       | X   |
| DV03         |       | X   |
| SV01         |       | X   |
| SV02         |       | X   |
| SV03         |       | X   |
| P01          | X     |     |
| RG-01        | X     |     |



**Table S4.** On/off positions of the valves to carry out the desorption process.

| Desorption process |       |     |
|--------------------|-------|-----|
|                    | Drive |     |
| TAG                | On    | Off |
| HV01               | X     |     |
| HV02               | X     |     |
| HV03               |       | X   |
| DV01               |       | X   |
| DV02               |       | X   |
| DV03               | X     |     |
| SV01               |       | X   |
| SV02               |       | X   |
| SV03               |       | X   |
| P02                | X     |     |
| RG-01              | X     |     |

**Table S5.** Design calculations for an additional smaller diameter column Ø63 mm not exceeding the necessary 1,200 mm height.

| Column size design calculations |        |        |
|---------------------------------|--------|--------|
| Ø63 mm                          |        |        |
| Flow (L/h)                      | 4.8    | 24     |
| Flow rate (m/h)                 | 1.9    | 9.4    |
| Adsorbent volume (L)            | 0.6    | 0.6    |
| BV (BV/h)                       | 8      | 40     |
| Area (m²)                       | 0.0026 | 0.0026 |
| Bed depth (m)                   | 0.24   | 0.24   |
| Expansion (%)                   | 100%   | 100%   |
| Column height (m)               | 0.47   | 0.47   |
| Contact time (min)              | 7.5    | 1.5    |

|                      |        |        |
|----------------------|--------|--------|
| Flow (L/h)           | 8      | 40     |
| Flow rate (m/h)      | 3.1    | 15.7   |
| Adsorbent volume (L) | 1      | 1      |
| BV (BV/h)            | 8      | 40     |
| Area (m²)            | 0.0026 | 0.0026 |
| Bed depth (m)        | 0.39   | 0.39   |
| Expansion (%)        | 100%   | 100%   |
| Column height (m)    | 0.78   | 0.78   |
| Contact time (min)   | 7.5    | 1.5    |

|                      |        |        |
|----------------------|--------|--------|
| Flow (L/h)           | 11,2   | 56     |
| Flow rate (m/h)      | 4.4    | 21.9   |
| Adsorbent volume (L) | 1.4    | 1.4    |
| BV (BV/h)            | 8      | 40     |
| Area (m²)            | 0.0026 | 0.0026 |
| Bed depth (m)        | 0,55   | 0,55   |
| Expansion (%)        | 100%   | 100%   |
| Column height (m)    | 1.10   | 1.10   |
| Contact time (min)   | 7.5    | 1.5    |
